# Supplementary material for: Awake functional MRI detects neural circuit dysfunction in a mouse model of autism
Source: PubMed Central journal article supplement — Sci Adv. 2020 Feb 5;6(6):eaav4520. doi: 10.1126/sciadv.aav4520 (PMC7002125; doi:10.1126/sciadv.aav4520), 2020-02-05
Supplement: aav4520_SM.pdf [file aav4520_SM.pdf]

## Supplementary Materials for

### **Awake functional MRI detects neural circuit dysfunction in a mouse model of autism**

Tomokazu Tsurugizawa\*, Kota Tamada, Nobukazu Ono, Sachise Karakawa, Yuko Kodama, Clement Debacker, Junichi Hata, Hideyuki Okano, Akihiko Kitamura, Andrew Zalesky, Toru Takumi\*

\*Corresponding author. Email: tsurugizawa@gmail.com (T.Ts.); toru.takumi@riken.jp (T.Ta.)

Published 5 February 2020, *Sci. Adv.* **6**, eaav4520 (2020)  
DOI: 10.1126/sciadv.aav4520

#### **This PDF file includes:**

Fig. S1. Awake fMRI system and physiological parameters.

Fig. S2. EEG recording.

Fig. S3. Head motion parameters.

Fig. S4. Similar BOLD response to odor stimulation in the olfactory bulb between WT and *15q dup*-saline mice.

Fig. S5. Common ICA components in WT and *15q dup* mice.

Fig. S6. DMN in WT and *15q dup* mice.

Fig. S7. Modular decomposition of functional connectivity networks and comparison of within-module-averaged connectivity.

Table S1. Amino acid concentration in hindbrain in WT and *15q dup* mice.

Table S2. Amino acid concentration in forebrain in WT and *15q dup* mice.

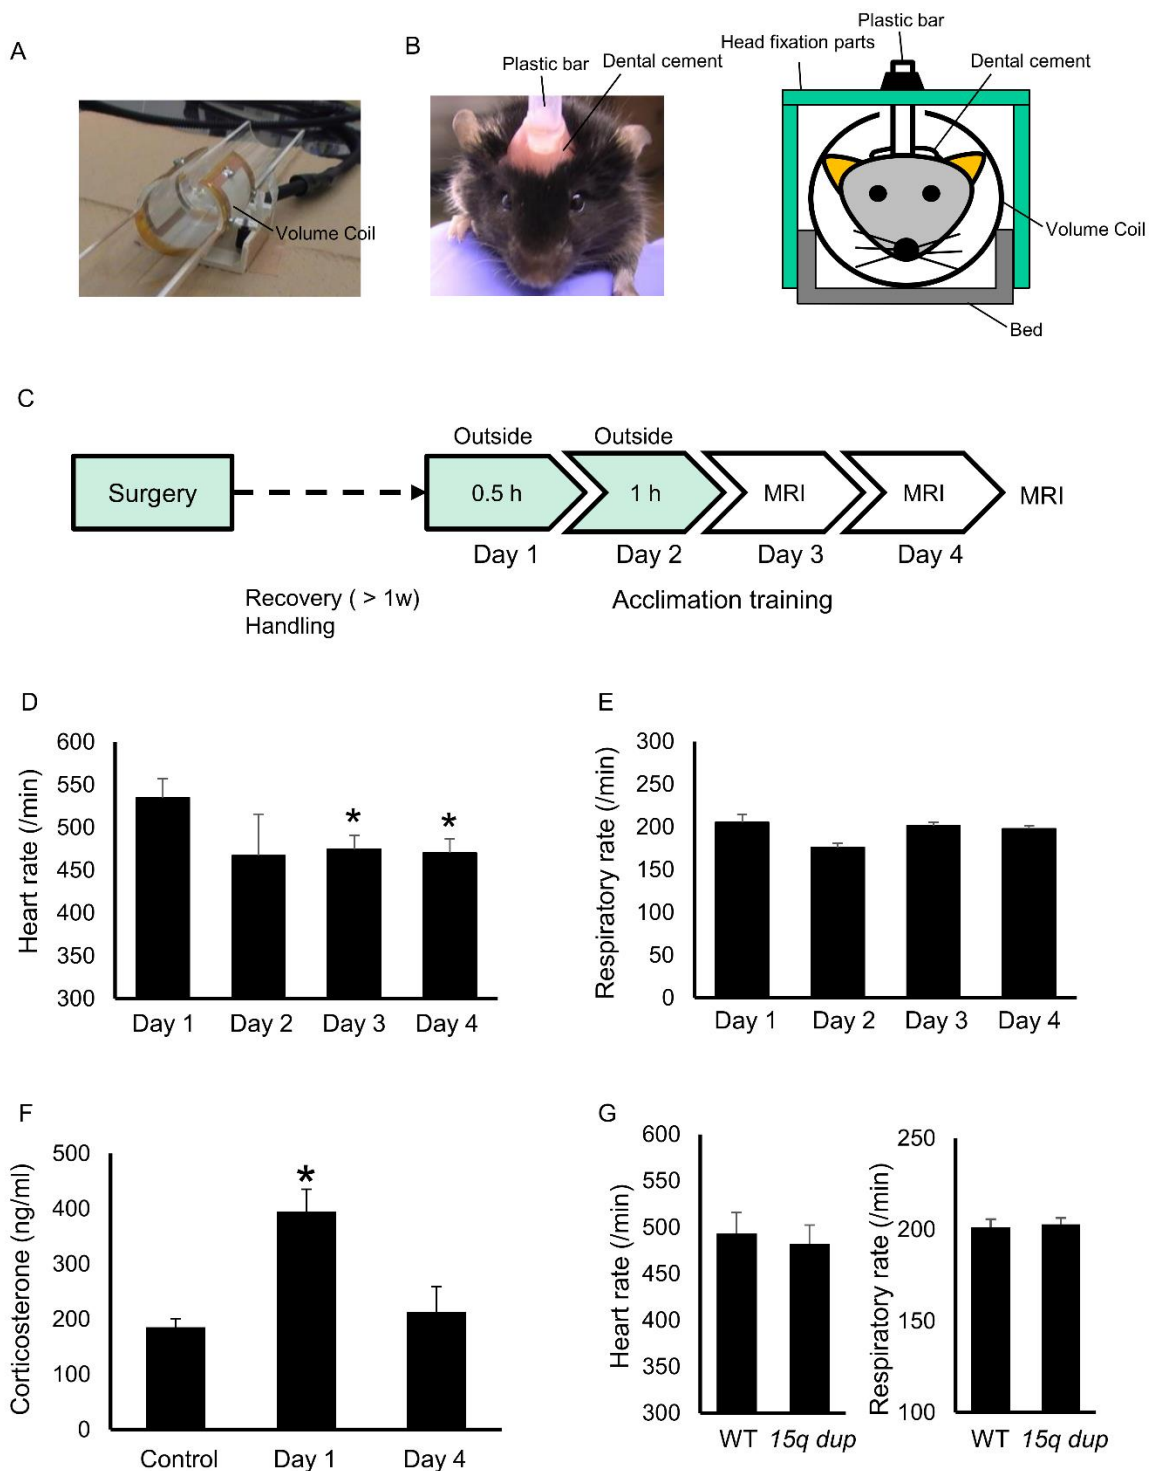

**Fig. S1. Awake fMRI system and physiological parameters.** (A) Dedicated volume coil for head fixation. (Photo Credit: Tomokazu Tsurugizawa, Ajinomoto Co., Inc.) (B) The head bar and dental cement on the mouse head and schematic figure of head fixation system. (C) Schedule of surgery and acclimation training for awake fMRI. (D) Heart rate (n=15), (E) Respiratory rate (n=15) and (F) Serum corticosterone level (n=5, 4 and 5 in control, day1 and day4, respectively) during the acclimation training. \* $p < 0.05$  by Tukey-Kramer multiple comparison test. (G) Heart rate and respiratory rate at day4 in WT (n=15) and *15q dup* groups (n=10).

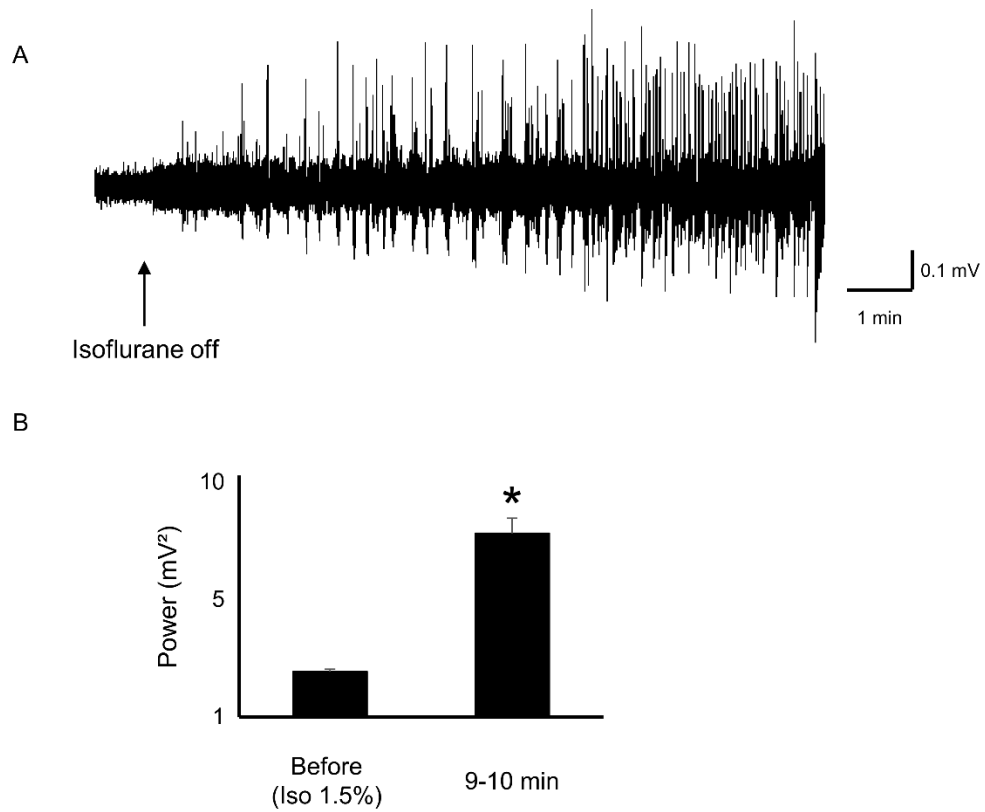

**Fig. S2. EEG recording.** (A) Time-course of EEG waves after turning off (arrow) in a representative mouse. (B) Averaged power of gamma frequency band during isoflurane anesthesia and at 9-10 min after turning off the isoflurane (n=4). \*p < 0.05 by paired t-test.

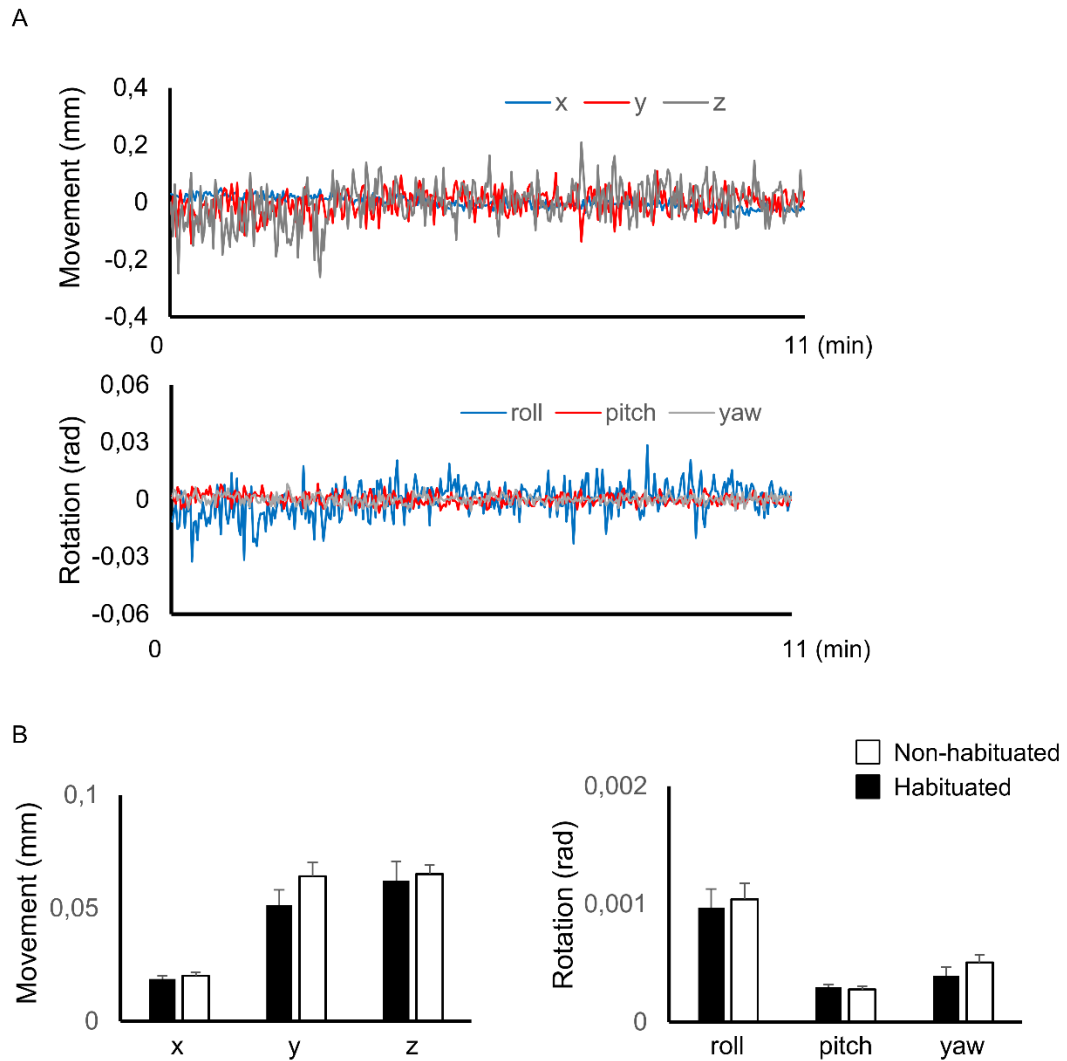

**Fig. S3. Head motion parameters.** (A) Six motion parameters (three translation and three rotation) during the MRI scanning in a representative WT-saline mouse. The x and y-direction corresponds to the in-plane direction and slices are acquired in the z- with 2D-gradient echo EPI parameters (B) The averaged motion parameters in habituated (after the training) and non-habituated (1st of the training in MRI bore) WT mice.

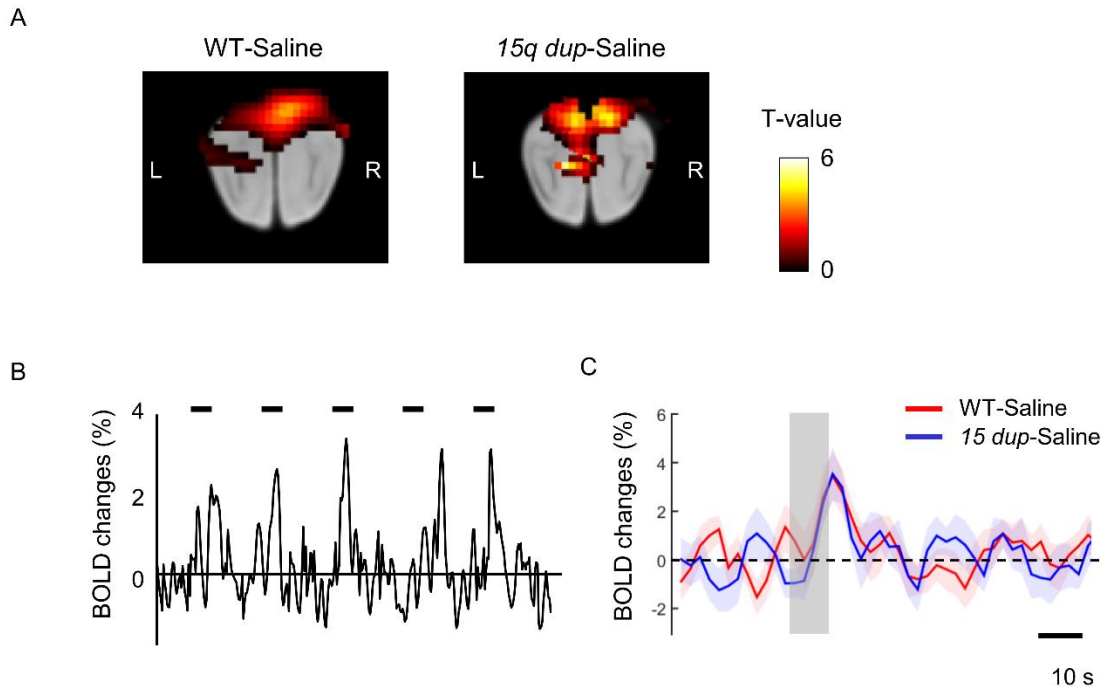

**Fig. S4. Similar BOLD response to odor stimulation in the olfactory bulb between WT and *15q dup*-saline mice.** (A) Significant BOLD response to other-odor stimulation in the olfactory bulb in WT-saline compared to *15q dup*-saline ( $p < 0.05$ , FDR-corrected at cluster level). Color bar represents t-statistic value. L/R represents the left/right hemisphere. (B) Time-course of BOLD signal changes within the activated voxels in the olfactory bulb in a representative WT mouse. (C) Time-course of averaged BOLD signals in WT-saline ( $n=15$ ) and *15q dup*-saline ( $n=10$ ) mice. Data are represented as mean  $\pm$  SEM.

## Identified Networks

### Lateral cortical network

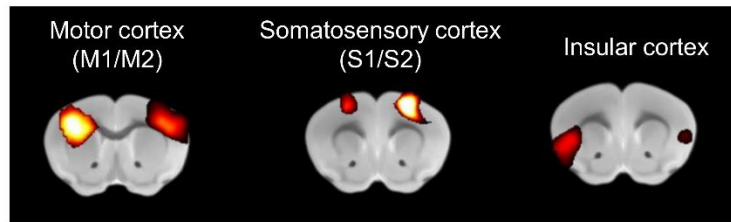

### Associated cortical network

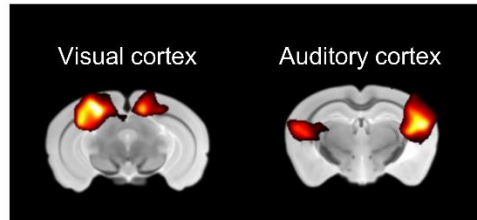

### Subcortical network

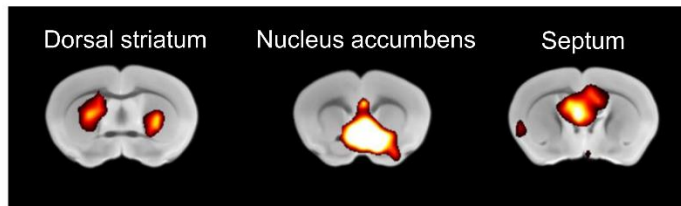

### Limbic network

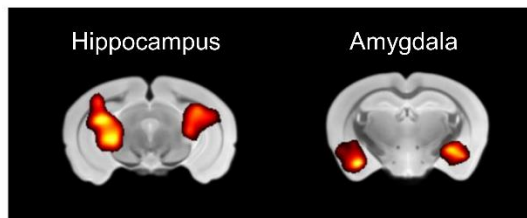

### Default mode network (DMN)

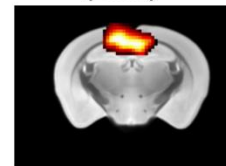

### Thalamic nuclei

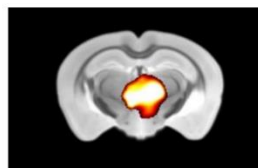

### Cerebellum

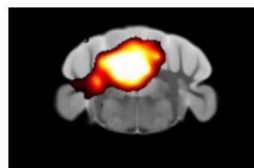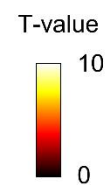

**Fig. S5. Common ICA components in WT and *15q dup* mice.** The common ICA components, lateral cortical network, associated cortical network, subcortical network, limbic network, default mode network, thalamic nuclei and cerebellar network were observed in WT and *15q dup* mice with saline or DCS injection.

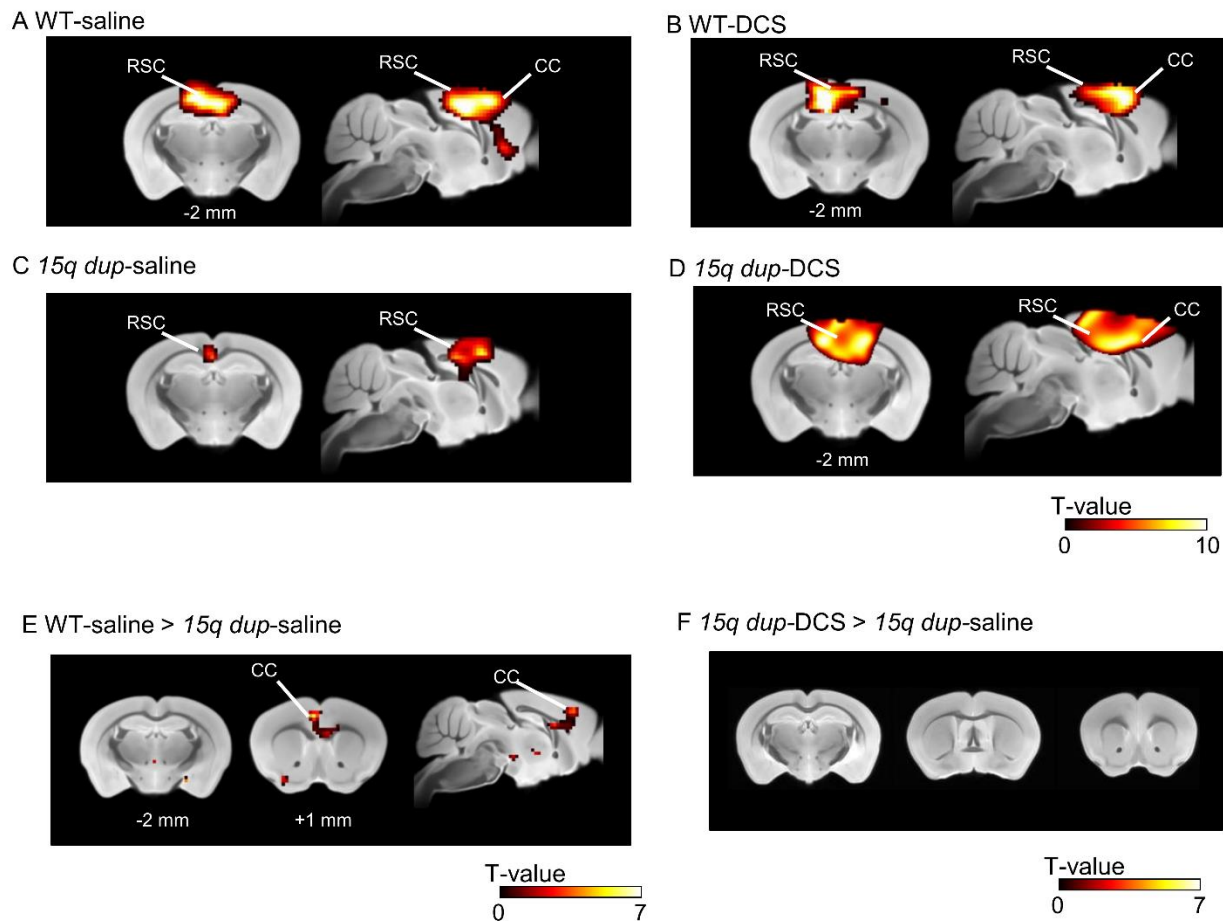

**Fig. S6. DMN in WT and *15q dup* mice.** DMN in (A) WT-saline mice (n=15), (B) WT-DCS (n=10), (C) *15q dup*-saline (n=10) and (D) *15q dup*-DCS mice (n=15). Color bar, t-values. Comparisons of DMN between (E) WT-saline and *15q dup*-saline groups and between (F) *15q dup*-saline and *15q dup*-DCS groups. CC, anterior cingulate cortex; RSC, retrosplenial cortex.

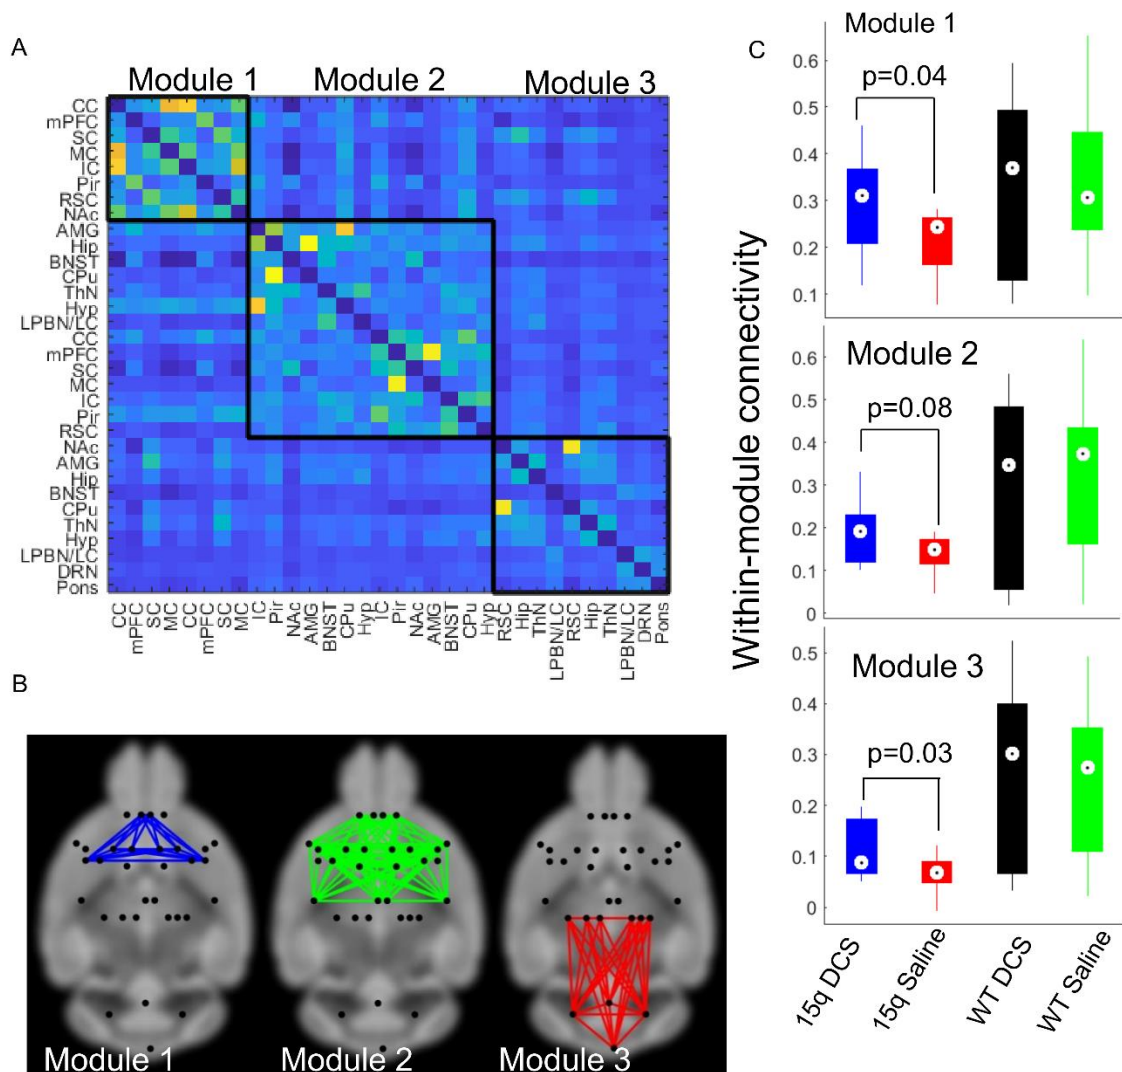

**Fig. S7. Modular decomposition of functional connectivity networks and comparison of within-module-averaged connectivity.** (A) Consensus modular decomposition yielded three distinct modules (Louvain algorithm). Modules represent a consensus across all mice. Solid black lines indicate boundaries between modules. Matrix rows/columns are reordered such that regions comprising common modules are shown consecutively. (B) Modules shown in planar anatomical space (axial representation). (C) Functional connectivity was averaged over all pair of connections comprising each module, yielding an estimate of within-module-averaged connectivity for each module. DCS did not impact within-module connectivity in the WT group. In the 15q dup group, administration of DCS significantly increased within-module connectivity for Modules 1 & 3 (two-sample, two-tailed t-test), compared to administration of saline. Between-module connectivity did not differ between DCS and saline (not shown). Circles indicate medians and boxes indicate 25th and 75th percentiles.



**Table S1. Amino acid concentration in hindbrain in WT and 15q dup mice.** AABA,  $\alpha$ -aminobutyric acid; AAAA,  $\alpha$ -aminoadipic acid; GABA,  $\gamma$ -Aminobutyric acid. N.D., not detected. \* $p < 0.05$  by t-test.

| Amino acids    | Cerebellum |         | Midbrain |         | Pons/Medulla |         |
|----------------|------------|---------|----------|---------|--------------|---------|
|                | WT         | 15q-dup | WT       | 15q-dup | WT           | 15q-dup |
| Taurine        | 5802.3     | 6456.1  | 3017.7   | 3212.8  | 2586.2       | 2461.0  |
| Aspartic acid  | 1957.9     | 1986.7  | 2319.8   | 2395.6  | 2455.0       | 2407.4  |
| Threonine      | 244.8      | 215.3   | 147.6    | 137.1   | 144.8        | 119.8   |
| Serine         | 484.9      | 273.7   | 249.7    | 235.3   | 238.9        | 208.0   |
| Asparagine     | 60.8       | 48.6    | 76.1     | 67.0    | 64.2         | 62.5    |
| Glutamic acid  | 6612.9     | 7071.7  | 4685.6   | 4927.8  | 4381.2       | 4306.2  |
| Glutamine      | 6203.5     | 5404.2  | 5469.7   | 3726.5  | 4185.8       | 3063.0  |
| AAAA           | 25.9       | 29.2    | 12.4     | 13.5    | 8.3          | 10.6    |
| Glycine        | 802.4      | 700.9   | 1326.5   | 1187.0  | 2930.5       | 2831.0  |
| Alanine        | 379.2      | 391.0   | 271.0    | 254.4   | 357.4        | 317.9   |
| Citrulline     | 24.2       | 24.4    | 6.4      | 5.6     | 11.4         | 10.0    |
| AABA           | 5.8        | 5.3     | 9.2      | 5.6     | 6.3          | 5.1     |
| Valine         | 71.2       | 45.0    | 58.2     | 52.3    | 45.7         | 43.8    |
| Methionine     | 33.8       | 31.9    | 26.7     | 20.6    | 21.3         | 17.0    |
| Cystathionine  | 31.9       | 27.3    | N.D.     | N.D.    | 24.0         | 30.1    |
| Leucine        | 60.7       | 41.8    | 48.5     | 40.0    | 40.5         | 34.7    |
| Isoleucine     | 32.4       | 19.5    | 21.0     | 20.2    | 19.7         | 17.5    |
| Tyrosine       | 81.4       | 57.6    | 52.2     | 42.1    | 44.9         | 36.7    |
| Phenylalanine  | 64.2       | 43.4    | 44.5     | 35.2    | 43.6         | 32.9    |
| GABA           | 1425.6     | 1408.0  | 3310.9   | 3095.1  | 1551.1       | 1392.6  |
| Tryptophan     | 18.1       | 16.0    | 13.4     | 12.4    | 13.6         | 12.5    |
| Ethanolamine   | 143.7      | 130.5   | 235.6    | 227.9   | 146.4        | 132.3   |
| Hydroxylysine  | 2.0        | 2.8     | 2.8      | 2.8     | N.D.         | N.D.    |
| Lysine         | 150.2      | 139.4   | 162.4    | 152.7   | 145.7        | 144.2   |
| Histidine      | 73.5       | 56.6    | 49.1     | 41.9    | 41.1         | 33.4    |
| Anserine       | N.D.       | N.D.    | N.D.     | N.D.    | N.D.         | N.D.    |
| Carnosine      | 56.4       | 53.8    | 70.9     | 63.6    | 79.3         | 69.5    |
| Arginine       | 147.1      | 167.0   | 232.3    | 226.9   | 250.6        | 243.4   |
| Hydroxyproline | 13.1       | 12.5    | 10.4     | 10.3    | 11.3         | 9.5     |
| Proline        | 75.9       | 60.1    | 52.1     | 47.1    | 41.1         | 39.9    |

**Table S2. Amino acid concentration in forebrain in WT and 15q dup mice.** AABA,  $\alpha$ -aminobutyric acid; AAAA,  $\alpha$ -amino adipic acid; GABA,  $\gamma$ -Aminobutyric acid. N.D., not detected. \* $p < 0.05$  by t-test.

| Amino acids    | Hippocampus |                 | Hypothalamus |         | Olfactory bulb |         | Frontal cortex |                |
|----------------|-------------|-----------------|--------------|---------|----------------|---------|----------------|----------------|
|                | WT          | 15q-dup         | WT           | 15q-dup | WT             | 15q-dup | WT             | 15q-dup        |
| Taurine        | 6377.6      | <b>6164.6 *</b> | 3609.6       | 3496.7  | 10890          | 12144   | 8171.7         | 8204.4         |
| Aspartic acid  | 1392.7      | 1269.2          | 2232.6       | 2399.7  | 2108.4         | 2021.6  | 2504.2         | 2300.1         |
| Threonine      | 148.9       | 131.0           | 182.0        | 154.3   | 202.1          | 198.1   | 158.5          | 144.4          |
| Serine         | 522.4       | 438.4           | 378.0        | 325.7   | 283.2          | 284.8   | 583.1          | <b>434.9 *</b> |
| Asparagine     | 60.7        | 57.1            | 91.5         | 91.3    | 61.3           | 66.9    | 85.0           | 83.4           |
| Glutamic acid  | 6882.2      | 6145.1          | 5450.6       | 5683.3  | 5129.0         | 5288.5  | 8703.8         | 9501.7         |
| Glutamine      | 5206.7      | 3872.5          | 6187.2       | 4956.0  | 4644.6         | 4742.0  | 5246.3         | 4609.0         |
| AAAA           | 11.0        | 12.3            | 21.6         | 26.3    | 13.8           | 17.0    | 18.4           | <b>29.1 *</b>  |
| Glycine        | 722.9       | 588.7           | 913.1        | 864.0   | 523.7          | 502.5   | 698.0          | 593.4          |
| Alanine        | 651.9       | 589.9           | 312.0        | 255.8   | 546.5          | 508.3   | 680.3          | 656.6          |
| Citrulline     | N.D.        | N.D.            | N.D.         | N.D.    | N.D.           | N.D.    | N.D.           | N.D.           |
| AABA           | 9.1         | 6.5             | 9.8          | 7.4     | 7.9            | 5.7     | 8.6            | 6.8            |
| Valine         | 61.4        | 52.2            | 77.1         | 68.8    | 74.9           | 72.8    | 69.4           | 59.4           |
| Methionine     | 29.3        | 23.2            | 31.5         | 26.3    | 28.2           | 30.6    | 28.3           | 26.8           |
| Cystathionine  | N.D.        | N.D.            | N.D.         | N.D.    | N.D.           | N.D.    | N.D.           | N.D.           |
| Leucine        | 48.4        | 36.5            | 60.9         | 53.3    | 66.6           | 55.8    | 51.9           | 42.9           |
| Isoleucine     | 21.8        | 18.1            | 26.6         | 23.2    | 29.2           | 28.9    | 24.6           | 23.0           |
| Tyrosine       | 56.9        | 45.3            | 64.0         | 54.1    | 53.0           | 56.9    | 55.7           | 47.8           |
| Phenylalanine  | 46.3        | 36.8            | 50.9         | 39.9    | 46.5           | 45.3    | 44.0           | 40.3           |
| GABA           | 1783.5      | 1511.4          | 4525.1       | 3953.8  | 4797.5         | 4468.3  | 1458.0         | 1438.7         |
| Tryptophan     | 12.3        | 13.2            | 16.5         | 15.1    | 11.4           | 15.8    | 11.6           | 11.8           |
| Ethanolamine   | 264.6       | 237.7           | 412.0        | 362.5   | 215.9          | 214.5   | 347.6          | 328.1          |
| Hydroxylysine  | 2.7         | 3.8             | 2.7          | 2.7     | N.D.           | N.D.    | 3.8            | 3.1            |
| Lysine         | 137.8       | 117.8           | 160.0        | 141.8   | 166.8          | 148.5   | 114.5          | 101.6          |
| Histidine      | 68.2        | 52.2            | 72.8         | 61.6    | 50.3           | 51.8    | 62.4           | 55.2           |
| Anserine       | N.D.        | N.D.            | N.D.         | N.D.    | 9.9            | 8.8     | N.D.           | N.D.           |
| Carnosine      | 24.9        | 22.6            | 46.3         | 33.9    | 1210.3         | 1155.0  | 90.9           | 91.0           |
| Arginine       | 102.9       | 95.2            | 137.4        | 129.9   | 95.7           | 100.8   | 80.6           | 88.6           |
| Hydroxyproline | 11.1        | 11.2            | 13.4         | 11.6    | 10.8           | 10.1    | 13.7           | 13.3           |
| Proline        | 64.1        | 56.8            | 62.7         | 55.5    | 112.3          | 116.7   | 82.6           | 78.0           |
